# Supplementary material
Source: Springer Nature journal article supplement (http://www.springermedizin.de/resource/supplementary/12872_2011_514_MOESM2_ESM.pdf/9430140)

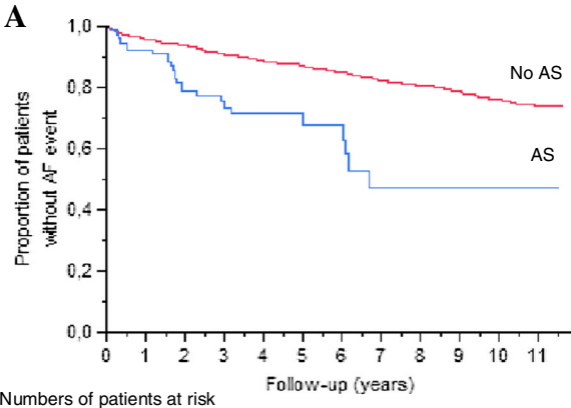

Numbers of patients at risk

|       |     |     |     |     |     |     |
|-------|-----|-----|-----|-----|-----|-----|
| No AS | 838 | 792 | 760 | 736 | 710 | 687 |
| AS    | 102 | 84  | 80  | 79  | 75  | 75  |

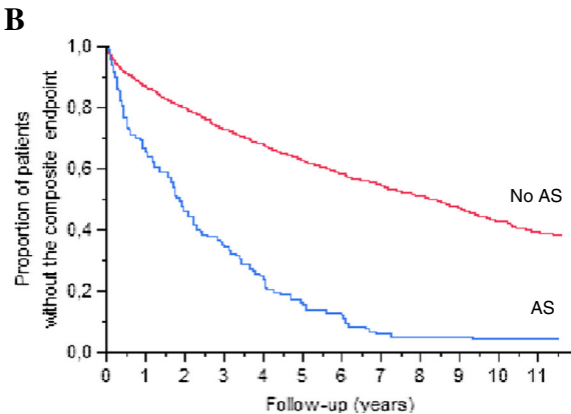

Numbers of patients at risk

|       |     |     |     |     |     |     |
|-------|-----|-----|-----|-----|-----|-----|
| No AS | 838 | 714 | 633 | 548 | 489 | 425 |
| AS    | 102 | 50  | 31  | 16  | 12  | 8   |

Supplement: MOESM2 [file 9430140]
